# Supplementary material
Source: MDPI journal article supplement (https://www.mdpi.com/2313-0105/9/9/473)
Supplement: s1 [file s1]

# Green Synthesis of Hierarchically Porous Carbon Derived from Coal Tar Pitch for Enhanced Lithium Storage

Mengdi Zhang \*, Meng Qu, Wenhan Yuan, Jiawei Mu, Zhengqiu He and Mingbo Wu \*

State Key Laboratory of Heavy Oil Processing, Advanced Chemical Engineering and Energy Materials Research Center, College of New Energy, China University of Petroleum (East China), Qingdao 266580, China; s21030062@s.upc.edu.cn (M.Q.); s21030031@s.upc.edu.cn (W.Y.); b22150023@s.upc.edu.cn (J.M.); b20030023@s.upc.edu.cn (Z.H.)

\* Correspondence: mdzhang@upc.edu.cn (M.Z.); wumb@upc.edu.cn (M.W.)

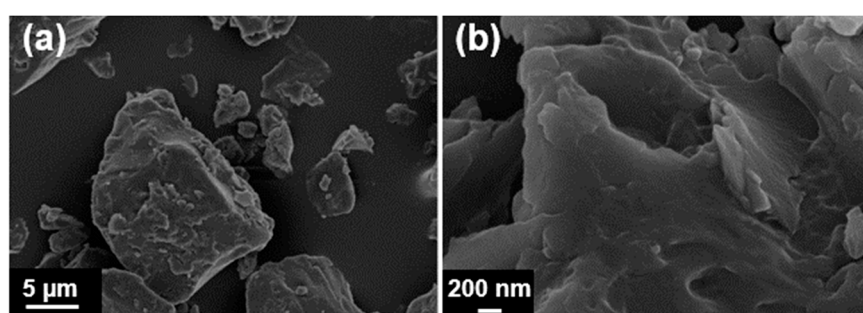

Figure S1. (a, b) SEM images of coal tar pitch.

**Citation:** Zhang, M.; Qu, M.; Yuan, W.; Mu, J.; He, Z.; Wu, M. Green Synthesis of Hierarchically Porous Carbon Derived from Coal Tar Pitch for Enhanced Lithium Storage. *Batteries* **2023**, *9*, 473. <https://doi.org/10.3390/batteries9090473>

Academic Editors: Seiji Kumagai, Yong-Joon Park

Received: 1 August 2023

Revised: 7 September 2023

Accepted: 18 September 2023

Published: 19 September 2023

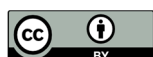

**Copyright:** © 2023 by the authors. Licensee MDPI, Basel, Switzerland. This article is an open access article distributed under the terms and conditions of the Creative Commons Attribution (CC BY) license (<https://creativecommons.org/licenses/by/4.0/>).

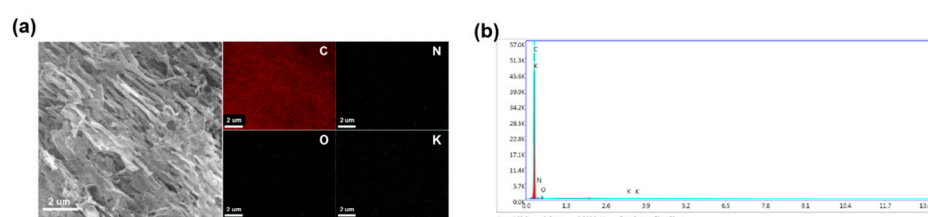

Figure S2. (a) SEM image and the corresponding EDS elemental mapping and (b) EDS spectrum of HPC-3.

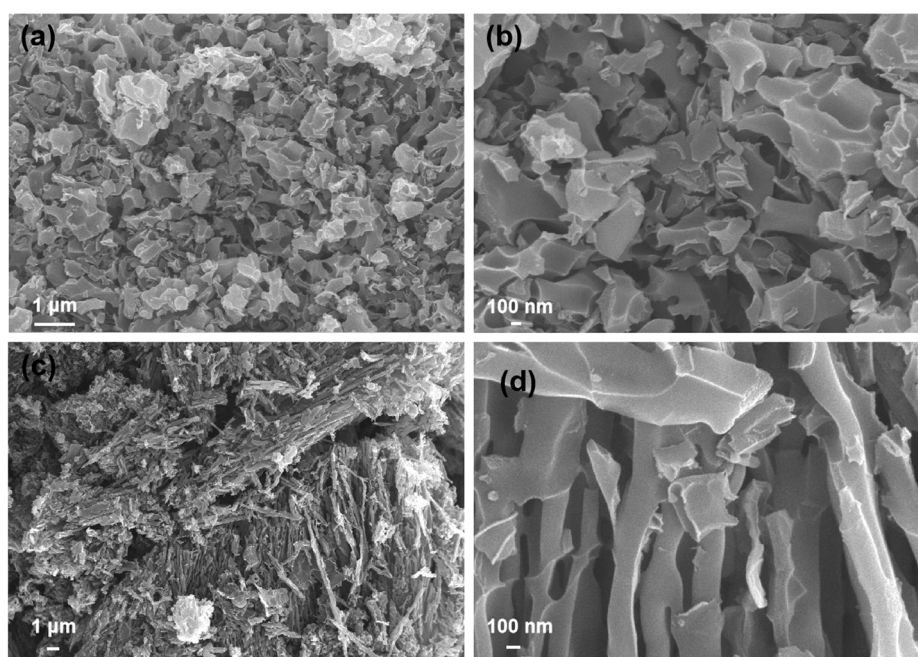

Figure S3. (a, b) SEM images of HPC-2. (c, d) SEM images of HPC-4.

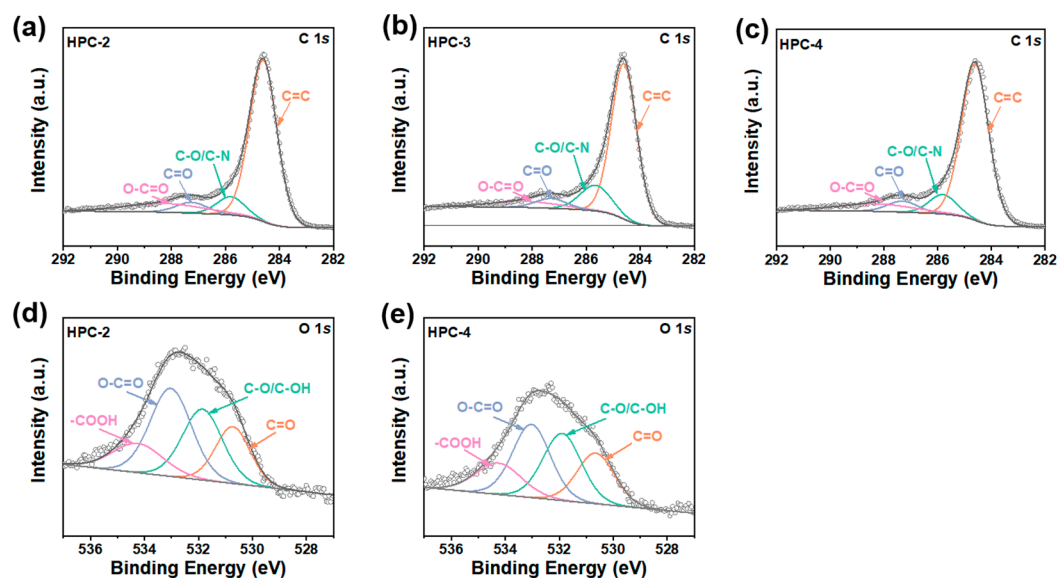

Figure S4. High-resolution XPS spectra of C 1s in (a) HPC-2, (b) HPC-3, and (c) HPC-4. High-resolution XPS spectra of O 1s in (d) HPC-2 and (e) HPC-4.

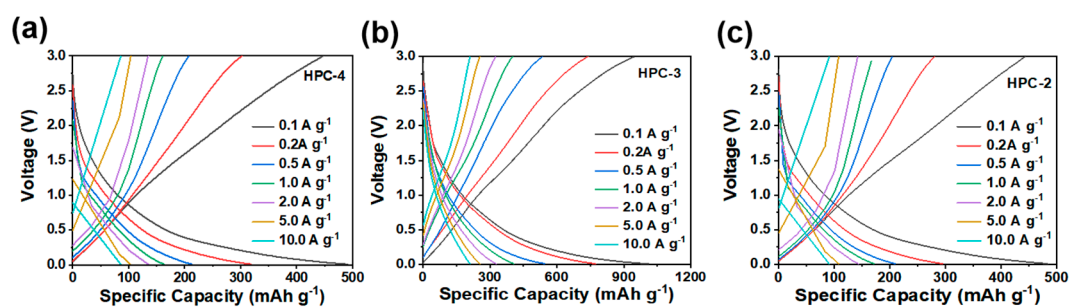

Figure S5. Galvanostatic charge/discharge profiles of (a) HPC-2, (b) HPC-3, and (c) HPC-4.

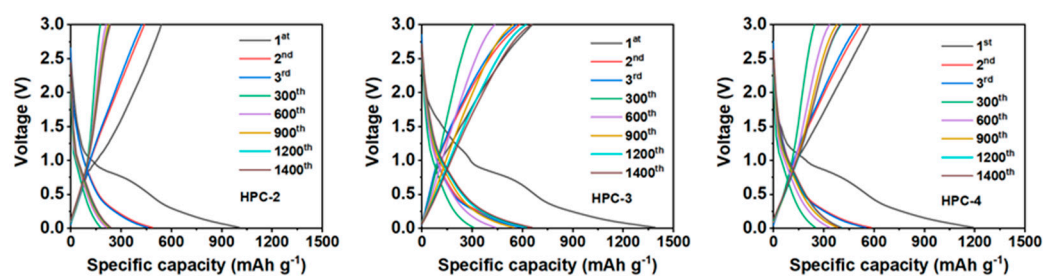

Figure S6. GCD profiles of (a) HPC-2, (b) HPC-3, and (c) HPC-4 during cycling.

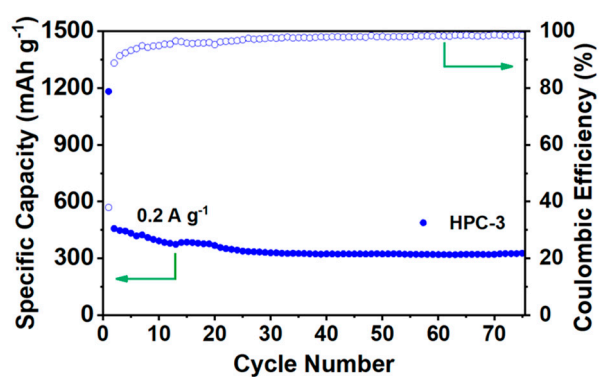

Figure S7. Cycling performance of HPC-3 at a current density of 0.2 A g<sup>-1</sup>.

Table S1. Element contents and O element configuration in HPC-X.

| Samples | C<br>(at.%) | O<br>(at.%) | N<br>(at.%) | O 1s |        |        |       |
|---------|-------------|-------------|-------------|------|--------|--------|-------|
|         |             |             |             | C=O  | C-O/C- | O=C-O- | -COOH |
|         |             |             |             | (%)  | N(%)   | (%)    | (%)   |
|         |             |             |             | (%)  | N(%)   | (%)    | (%)   |
| HPC-2   | 93.9        | 5.5         | 0.6         | 19.8 | 28.5   | 36.7   | 14.9  |
| HPC-3   | 94.4        | 4.7         | 0.9         | 25.4 | 24.8   | 33.1   | 16.7  |
| HPC-4   | 94.3        | 4.9         | 0.8         | 21.8 | 29.7   | 31.9   | 16.6  |
